# Supplementary material for: gapseq: informed prediction of bacterial metabolic pathways and reconstruction of accurate metabolic models
Source: PubMed Central journal article supplement (PMC7949252; doi:10.1186/s13059-021-02295-1), 2021-03-10

# **Additional file 1**

Supplementary figures S1-5

**gapseq: informed prediction of bacterial metabolic pathways and reconstruction of accurate metabolic models**

Johannes Zimmermann, Christoph Kaleta, Silvio Waschina

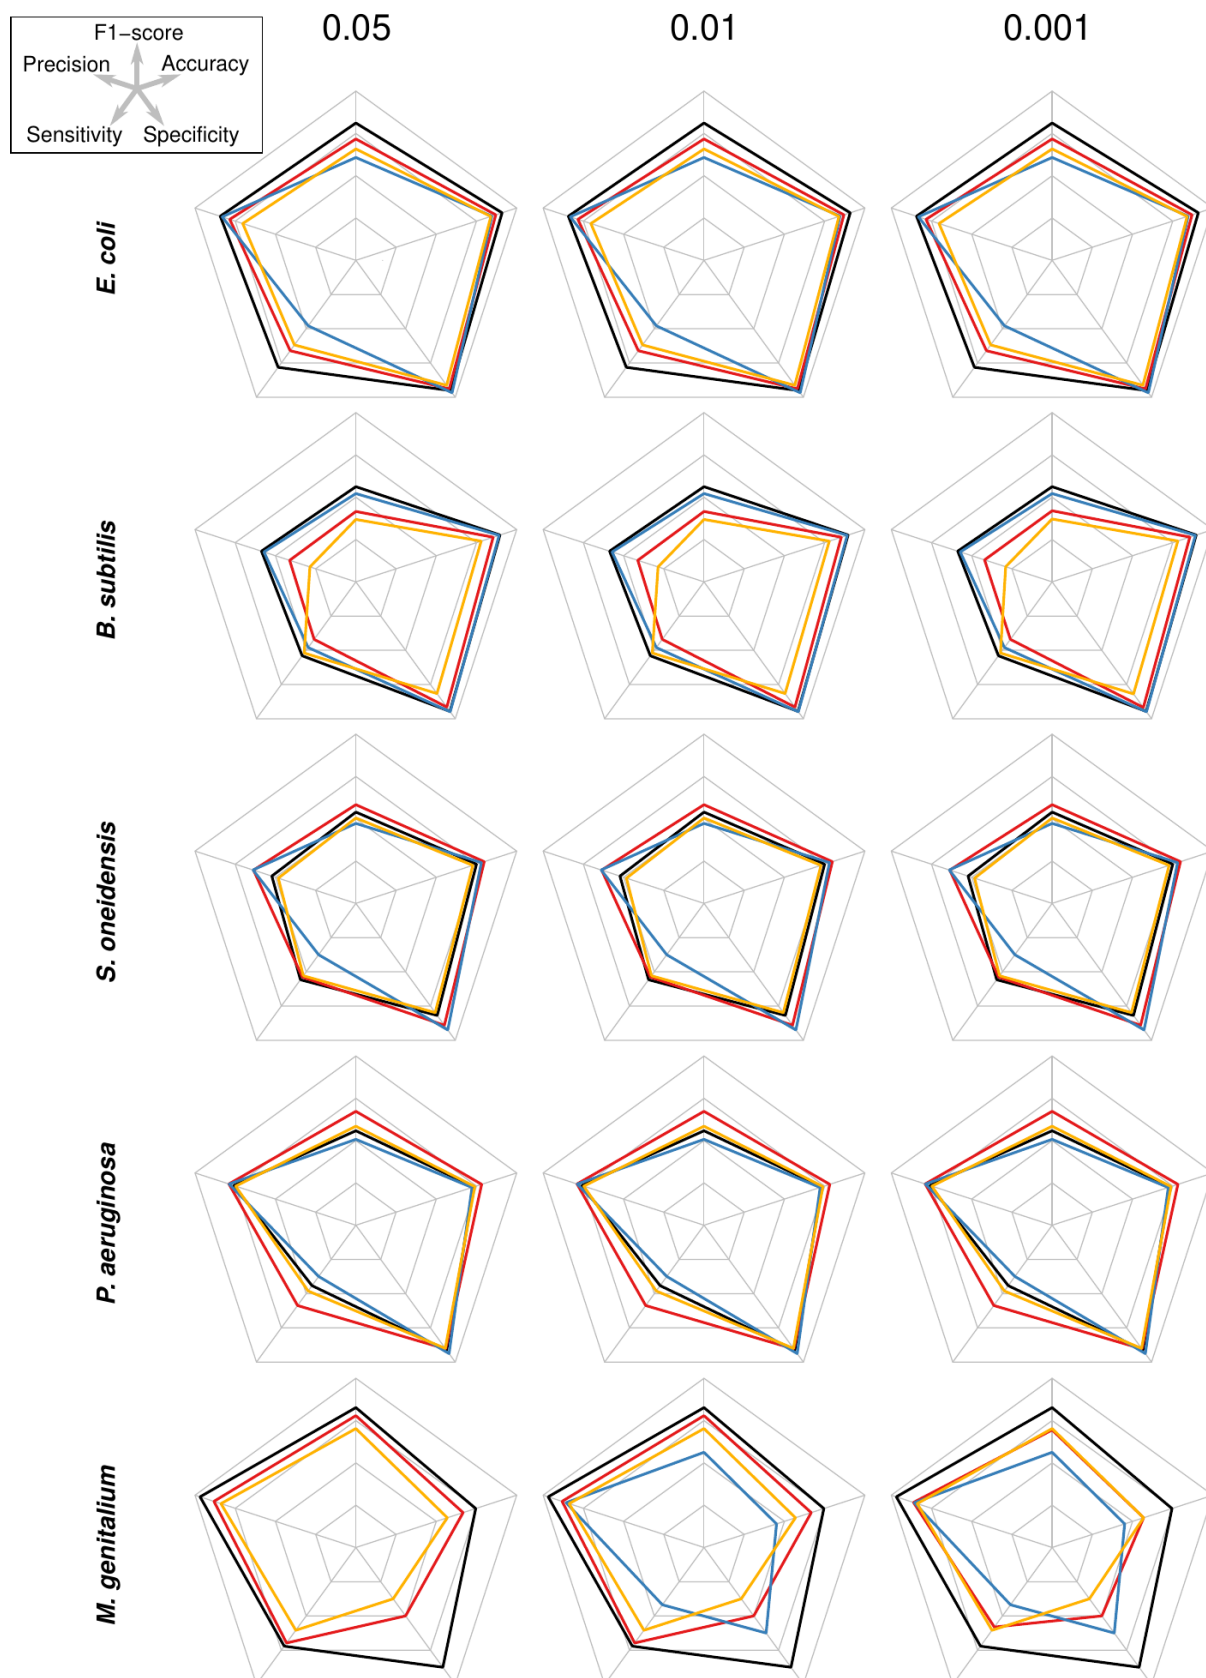

**Fig S1** – Results from gene essentiality tests for three different growth rate thresholds. Genes were predicted to be essential if the predicted growth rate of the respective gene knock-out strain was below 0.05  $\text{hr}^{-1}$ , 0.01  $\text{hr}^{-1}$  or 0.001  $\text{hr}^{-1}$ . Charts in second column (0.01  $\text{hr}^{-1}$ ) represent the same results as in Figure 2. The radar chart axes display results for five test scores (see top left legend). Axes scales are linear with 0 in the centre and 1 at the corners. The essentiality tests were not feasible with the cutoff 0.05  $\text{hr}^{-1}$  for the *M. genitalium* CarveMe reconstruction, as the predicted growth without knockouts was already below this threshold (0.034  $\text{hr}^{-1}$ ).

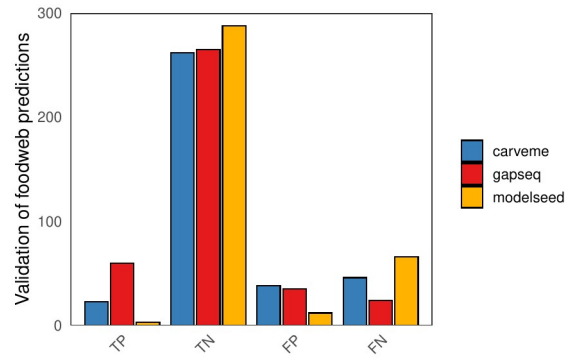

**Fig S2** – Validation of substance production and consumption in anaerobic gut communities as referred to Additional file 2: Table S4.

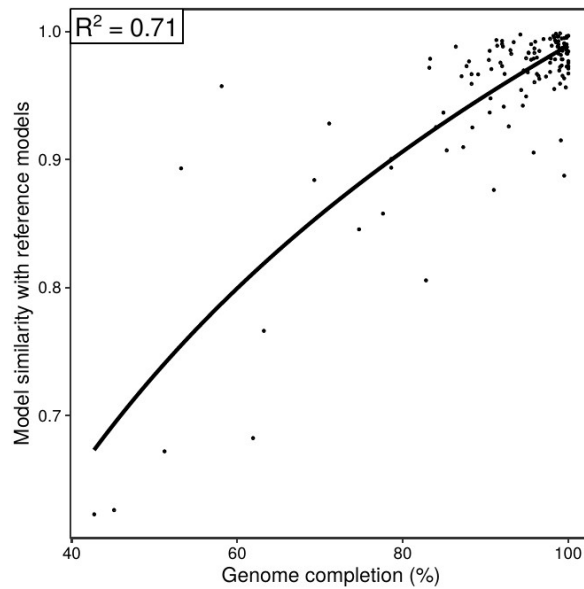

**Fig S3** – Similarity of *gapseq* models reconstructed for 127 species-level genome bins (SGBs) from metagenomes compared to models reconstructed for reference genomes (RefSeq Prokaryotic Genomes). The x-axis represents the genome assembly completion of SGBs estimated using the BUSCO software version 4.0.6 ([Simao et al. \(2015, Bioinformatics\)](#)). The line shows the result of non-linear regression using a logarithmic function of form  $y(x)=c+b*\log(x)$ . Sequences of SGBs were obtained from [Pasolli et al. \(2019, Cell\)](#).

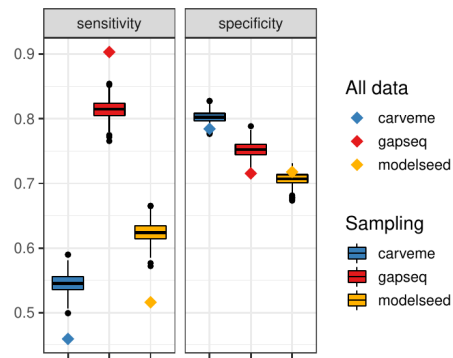

**Fig S4** – Re-sampling test of enzyme prediction. Evaluation of enzyme predictions using a re-sampling test (500 iterations), where equal numbers of tests (n=100) for each EC number contributed to the evaluation statistics. Distribution of sensitivity and specificity of CarveMe, ModelSEED, and *gapseq* predictions of sampled data are shown (boxplot) compared with the original data (rhombus).

**Fig S5** – Predicted metabolite production and consumption in an anaerobic microbial community using CarveMe, *gapseq*, and ModelSEED model reconstructions. Predictions are based on an agent-based dynamic simulation using the BacArena package within R and shown for all 7 time steps of the simulation.

(see next page)

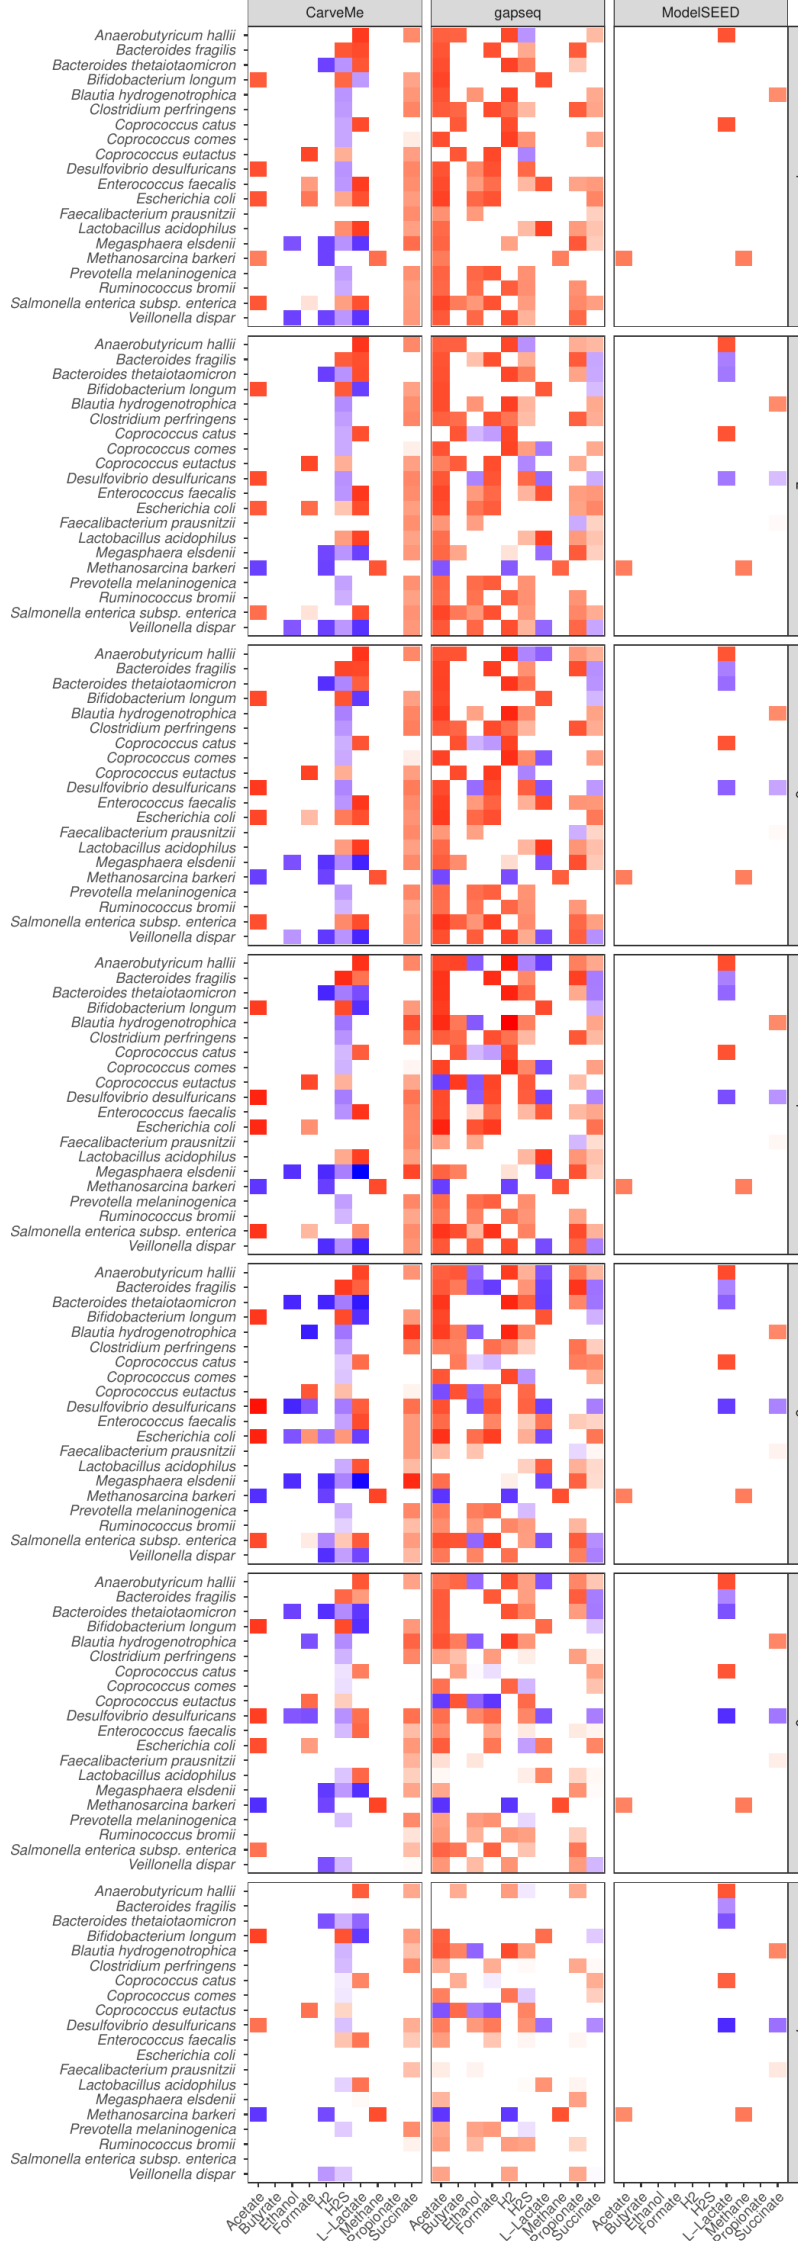

Supplement: 13059_2021_2295_MOESM1_ESM.pdf [file 13059_2021_2295_MOESM1_ESM.pdf]
